# Supplementary material for: Assessment of Interlaboratory Variation in the Interpretation of Genomic Test Results in Patients With Epilepsy
Source: PubMed Central journal article supplement (PMC7191323; doi:10.1001/jamanetworkopen.2020.3812), 2020-04-29
Supplement: jamanetwopen-3-e203812-s001.pdf [file jamanetwopen-3-e203812-s001.pdf]

## Supplementary Online Content

SoRelle JA, Pascual JM, Gotway G, Park JY. Assessment of interlaboratory variation in the interpretation of genomic test results in patients with epilepsy. *JAMA Netw Open*. 2020;3(4):e203812. doi:10.1001/jamanetworkopen.2020.3812

**eTable 1.** Genes Associated With Epilepsy

**eTable 2.** Variants With Clinically Substantial Discrepancies

**eTable 3.** *SCN1A* Variant Discordance, Not Clinically Substantial

This supplementary material has been provided by the authors to give readers additional information about their work.

**eTable 1.** Genes Associated With Epilepsy

|                            |                          |                           |                           |                           |                         |
|----------------------------|--------------------------|---------------------------|---------------------------|---------------------------|-------------------------|
| <i>ADSL</i>                | <i>CLN5</i>              | <i>GABRG2</i>             | <i>LIAS</i>               | <i>PPT1</i>               | <i>SRPX2</i>            |
| <i>ALDH7A1<sup>a</sup></i> | <i>CLN6</i>              | <i>GAMT</i>               | <i>MAGI2</i>              | <i>PRICKLE1</i>           | <i>STXBP1</i>           |
| <i>ARX</i>                 | <i>CLN8</i>              | <i>GATM</i>               | <i>MBD5</i>               | <i>PRRT2<sup>a</sup></i>  | <i>SYN1</i>             |
| <i>ATP1A2</i>              | <i>CNTNAP2</i>           | <i>GRIN2A<sup>a</sup></i> | <i>MECP2</i>              | <i>SCARB2</i>             | <i>TBC1D24</i>          |
| <i>ATP6AP2</i>             | <i>CSTB</i>              | <i>GRIN2B</i>             | <i>MEF2C</i>              | <i>SCN1A<sup>a</sup></i>  | <i>TCF4</i>             |
| <i>CACNB4</i>              | <i>CTSD</i>              | <i>GOSR2</i>              | <i>MFSD8</i>              | <i>SCN1B</i>              | <i>TPP1</i>             |
| <i>CDKL5</i>               | <i>DNAJC5</i>            | <i>KANSL1</i>             | <i>NHLRC1</i>             | <i>SCN2A<sup>a</sup></i>  | <i>TSC1<sup>a</sup></i> |
| <i>CHRNA2<sup>a</sup></i>  | <i>EFHC1</i>             | <i>KCNJ10</i>             | <i>NRXN1</i>              | <i>SCN8A<sup>a</sup></i>  | <i>TSC2<sup>a</sup></i> |
| <i>CHRNA4<sup>a</sup></i>  | <i>EPM2A<sup>a</sup></i> | <i>KCNQ2<sup>a</sup></i>  | <i>PCDH19<sup>a</sup></i> | <i>SLC25A22</i>           | <i>UBE3A</i>            |
| <i>CHRNA7</i>              | <i>FOLR1</i>             | <i>KCNQ3<sup>a</sup></i>  | <i>PNKP</i>               | <i>SLC2A1<sup>a</sup></i> | <i>ZEB2</i>             |
| <i>CHRNA2<sup>a</sup></i>  | <i>FOXP1</i>             | <i>KCTD7</i>              | <i>PNPO<sup>a</sup></i>   | <i>SLC9A6</i>             |                         |
| <i>CLN3</i>                | <i>GABRA1</i>            | <i>LGI1</i>               | <i>POLG<sup>a</sup></i>   | <i>SPTAN1</i>             |                         |

<sup>a</sup>Denotes genes with therapeutic significance

**eTable 2. Variants With Clinically Substantial Discrepancies**

| Gene    | Nucleotide change    | Amino acid change                       | Transcript     | dbSNP        |
|---------|----------------------|-----------------------------------------|----------------|--------------|
| ADSL    | c.153+1G>T           |                                         | NM_000026.2    | rs155593969  |
| ADSL    | c.1342T>C            | p.Ser448Pro                             | NM_000026.2    | rs771121666  |
| ADSL    | c.1400C>G            | p.Pro467Arg                             | NM_000026.2    | rs1057521071 |
| ADSL    | c.953C>T             | p.Pro318Leu                             | NM_000026.2    | rs202064195  |
| ALDH7A1 | c.34delG             | p.Ala12Leufs                            | NM_001182.4    | rs750693623  |
| ALDH7A1 | c.575C>T             | p.Thr192Met                             | NM_001182.4    | rs376917645  |
| ALDH7A1 | c.664A>G             | p.Thr222Ala                             | NM_001182.4    | rs777829351  |
| ALDH7A1 | c.1232C>T            | p.Pro411Leu                             | NM_001182.4    | rs780233639  |
| ALDH7A1 | c.1301A>G            | p.Tyr434Cys                             | NM_001182.4    | rs747597620  |
| ARX     | c.428_451dup24       | p.Ala150_Ala151insGlyAlaAlaAlaAlaAlaAla | NM_139058.2    | rs387906493  |
| ARX     | c.453_458dupGGCCGC   | p.Ala155_Trp156insAlaAla                | NM_139058.2    | rs398124512  |
| ATP1A2  | c.1777C>T            | p.Arg593Trp                             | NM_000702.3    | rs886039530  |
| ATP1A2  | c.2438T>A            | p.Met813Lys                             | NM_000702.3    | rs796052277  |
| CDKL5   | c.2842C>T            | p.Arg948Ter                             | NM_001323289.2 | rs1555955296 |
| CHRNA2  | c.1291G>C            | p.Val431Leu                             | NM_000748.2    | rs1064796396 |
| CLN3    | c.1213C>T            | p.Arg405Trp                             | NM_001042432.1 | rs139842473  |
| CLN3    | c.790+3A>C           |                                         | NM_001042432.1 | rs386833738  |
| CLN5    | c.1121A>G            | p.Tyr374Cys                             | NM_006493.2    | rs148862100  |
| CLN5    | c.334C>T             | p.Arg112Cys                             | NM_006493.2    | rs786205211  |
| CLN6    | c.794_796delCCT      | p.Ser265del                             | NM_017882.2    | rs768422260  |
| CLN6    | c.898T>C             | p.Trp300Arg                             | NM_017882.2    | rs750937323  |
| CLN8    | c.209G>A             | p.Arg70His                              | NM_018941.3    | rs386834124  |
| CLN8    | c.703delC            | p.Val236Serfs                           | NM_018941.3    | rs761621368  |
| CSTB    | c.1_2insAT           | p.Met1Asnfs                             | NM_000100.3    | rs1555955296 |
| CTSD    | c.751G>A             | p.Asp251Asn                             | NM_001909.4    | rs1064796396 |
| FOLR1   | c.493+2T>C           |                                         | NM_016725.2    | rs1044894207 |
| FOXP1   | c.670G>A             | p.Gly224Ser                             | NM_005249.4    | rs727503935  |
| FOXP1   | c.685A>C             | p.Ile229Leu                             | NM_005249.4    | rs1064797186 |
| GABRA1  | c.335G>A             | p.Arg112Gln                             | NM_000806.5    | rs587777308  |
| GABRA1  | c.640C>T             | p.Arg214Cys                             | NM_000806.5    | rs727503940  |
| GABRA1  | c.851T>C             | p.Val284Ala                             | NM_000806.5    | rs794727962  |
| GABRG2  | c.269C>T             | p.Thr90Met                              | NM000816.3     | rs1057520498 |
| GABRG2  | c.549-3T>G           |                                         | NM198903.2     | rs750459631  |
| GABRG2  | c.1000G>A            | p.Ala334Thr                             | NM000816.3     | rs398123523  |
| GABRG2  | c.1336C>T            | p.Arg446Trp                             | NM000816.3     | rs796052515  |
| GAMT    | c.507_521dup         | p.Ser173_Trp174insCysAsnLeuThrSer       | NM_000156.5    | rs763407972  |
| GRIN2A  | c.2069C>T            | p.Thr690Met                             | NM_000833.4    | rs1445802934 |
| GRIN2A  | c.2197G>A            | p.Ala733Thr                             | NM_000833.4    | rs796052550  |
| GRIN2A  | c.2452G>A            | p.Ala818Thr                             | NM_000833.4    | rs1555483699 |
| GRIN2B  | c.1547A>G            | p.Asn516Ser                             | NM_000834.4    | rs886041295  |
| GRIN2B  | c.1672G>A            | p.Val558Ile                             | NM_000834.4    | rs1057519004 |
| GRIN2B  | c.1727_1732delTCTTTG | p.Val576_Phe577del                      | NM_000834.4    | rs1555111511 |
| GRIN2B  | c.2002G>A            | p.Asp558Asn                             | NM_000834.4    | rs876661151  |
| GRIN2B  | c.2087G>A            | p.Arg696His                             | NM_000834.4    | rs1555103971 |
| GRIN2B  | c.2450A>G            | p.Asn817Ser                             | NM_000834.4    | rs1555103159 |
| GRIN2B  | c.2459G>C            | p.Gly820Ala                             | NM_000834.4    | rs797044849  |
| KANSL1  | c.868C>T             | p.Arg290Ter                             | NM_001193466.1 | rs144637717  |
| KCNJ10  | c.76C>T              | p.Arg26Ter                              | NM_002241.4    | rs138943405  |
| KCNJ10  | c.221C>T             | p.Thr74Ile                              | NM_002241.4    | rs796052604  |
| KCNQ2   | c.593G>A             | p.Arg198Gln                             | NM_172107.3    | rs796052621  |
| KCNQ2   | c.601C>T             | p.Arg201Cys                             | NM_172107.3    | rs796052623  |
| KCNQ2   | c.637C>T             | p.Arg213Trp                             | NM_172107.3    | rs118192203  |
| KCNQ2   | c.701C>T             | p.Thr234Ile                             | NM_172107.3    | rs794727741  |
| KCNQ2   | c.704C>T             | p.Ala235Val                             | NM_172107.3    | rs797045638  |
| KCNQ2   | c.782T>C             | p.Phe261Ser                             | NM_172107.3    | rs796052631  |
| KCNQ2   | c.841G>A             | p.Gly281Arg                             | NM_172107.3    | rs794727813  |
| KCNQ2   | c.901G>A             | p.Gly301Ser                             | NM_172107.3    | rs1057516099 |
| KCNQ2   | c.1057C>T            | p.Arg353Cys                             | NM_172107.3    | rs118192218  |
| KCNQ2   | c.1627G>A            | p.Val543Met                             | NM_172107.3    | rs794727134  |
| KCNQ2   | c.1639C>T            | p.Arg547Trp                             | NM_172107.3    | rs796052650  |
| KCNQ2   | c.1887+5G>A          |                                         | NM_172107.3    | rs777916008  |
| KCNQ2   | c.2245G>T            | p.Glu749Ter                             | NM_172107.3    | rs796052658  |
| KCTD7   | c.172G>A             | p.Gly58Arg                              | NM_153033.4    | rs750033880  |
| KCTD7   | c.190A>G             | p.thr64Ala                              | NM_153033.4    | rs201296399  |
| KCTD7   | c.456G>A             | p.Val152=                               | NM_153033.4    | rs796052686  |
| LIAS    | c.983T>A             | p.Phe328Tyr                             | NM_006859.3    | rs779931959  |

|          |                  |               |                |                             |
|----------|------------------|---------------|----------------|-----------------------------|
| MECP2    | c.343C>T         | p.Arg115Cys   | NM_004992.3    | rs267608388                 |
| MECP2    | c.397C>T         | p.Arg133Cys   | NM_004992.3    | rs28934904                  |
| MECP2    | c.455C>G         | p.Pro152Arg   | NM_004992.3    | rs61748404                  |
| MECP2    | c.568C>T         | p.Arg190Cys   | NM_004992.3    | rs587783137                 |
| MECP2    | c.602C>T         | p.Ala201Val   | NM_004992.3    | rs61748381                  |
| MECP2    | c.1129_1198del70 | p.Lys377Profs | NM_004992.3    | rs1557135353                |
| MECP2    | c.1200A>C        | p.Pro400=     | NM_001110792.1 | rs797044732                 |
| MFSD8    | c.362A>G         | p.Tyr121Cys   | NM_152778.2    | rs118203978                 |
| MFSD8    | c.1006G>C        | p.Glu336Gln   | NM_152778.2    | rs150418024                 |
| NHLRC1   | c.386C>A         | p.Pro129His   | NM_198586.2    | rs750465793                 |
| NHLRC1   | c.1142A>G        | p.Asp381Gly   | NM_198586.2    | rs200201752                 |
| NRXN1    | c.3619C>T        | p.Arg1207Ter  | NM_001135659.2 | rs149830411                 |
| PCDH19   | c.697G>T         | p.Asp233Tyr   | NM_001184880.1 | rs1555985482                |
| PCDH19   | c.707C>G         | Pro236Arg     | NM_001184880.1 | rs1060502176                |
| PCDH19   | c.790G>T         | p.Asp264Tyr   | NM_001105243.1 | rs587784300                 |
| PCDH19   | c.1114C>T        | p.Arg372Trp   | NM_001184880.1 | rs796052812                 |
| PCDH19   | c.1682C>G        | p.Pro561Arg   | NM_001184880.1 | rs796052819                 |
| PNKP     | c.1029+2T>C      |               | NM_007254.3    | rs199919568                 |
| PNKP     | c.1123G>T        | p.Gly375Trp   | NM_007254.3    | rs786203983                 |
| PNKP     | c.1385G>C        | p.Arg462Pro   | NM_007254.3    | rs376854895                 |
| PNKP     | c.968C>T         | p.Thr323Met   | NM_007254.3    | rs372148913                 |
| PNPO     | c.686G>A         | p.Arg229Gln   | NM_018129.3    | rs773450573                 |
| POLG     | c.488C>T         | p.Pro163Leu   | NM_002693.2    | rs752892262                 |
| POLG     | c.752C>T         | p.Thr251Ile   | NM_002693.2    | rs113994094                 |
| POLG     | c.830A>T         | p.His277Leu   | NM_002693.2    | rs138929605                 |
| POLG     | c.855G>C         | p.Gln285His   | NM_002693.2    | rs141367015                 |
| POLG     | c.1156C>T        | p.Arg386Cys   | NM_002693.2    | rs199759055                 |
| POLG     | c.1276G>A        | p.Gly426Ser   | NM_002693.2    | rs775576189                 |
| POLG     | c.1402A>G        | p.Asn468Asp   | NM_002693.2    | rs145843073                 |
| POLG     | c.1760C>T        | p.Pro587Leu   | NM_002693.2    | rs113994096                 |
| POLG     | c.1763G>A        | p.Gly588Asp   | NM_002693.2    | rs371334941                 |
| POLG     | c.1790G>A        | p.Arg597Gln   | NM_002693.2    | Chr15(GRCh38);g.89325609G>A |
| POLG     | c.2209G>C        | p.Gly737Arg   | NM_002693.2    | rs121918054                 |
| POLG     | c.2243G>C        | p.Trp748Ser   | NM_002693.2    | rs113994097                 |
| POLG     | c.2246T>C        | p.Phe749Ser   | NM_002693.2    | rs202037973                 |
| POLG     | c.2264A>C        | p.Lys755Thr   | NM_002693.2    | rs770438363                 |
| POLG     | c.2293C>A        | p.Pro765Thr   | NM_002693.2    | rs1003442806                |
| POLG     | c.2419C>T        | p.Arg807Cys   | NM_002693.2    | rs769827124                 |
| POLG     | c.2606G>A        | p.Arg869Gln   | NM_002693.2    | rs1356604153                |
| POLG     | c.2620T>A        | p.Leu874Met   | NM_002693.2    | rs758402960                 |
| POLG     | c.2636A>G        | p.Gln879Arg   | NM_002693.2    | rs368587966                 |
| POLG     | c.2642C>T        | p.Pro881Leu   | NM_002693.2    | rs375935084                 |
| POLG     | c.264C>G         | p.Phe88Leu    | NM_002693.2    | rs144439703                 |
| POLG     | c.2663G>A        | p.Gly888Asp   | NM_002693.2    | rs878854560                 |
| POLG     | c.2665G>A        | p.Ala889Thr   | NM_002693.2    | rs763393580                 |
| POLG     | c.2740A>C        | p.Thr914Pro   | NM_002693.2    | rs139590686                 |
| POLG     | c.2857C>T        | p.Arg953Cys   | NM_002693.2    | rs11546842                  |
| POLG     | c.2890C>T        | p.Arg964Cys   | NM_002693.2    | rs201477273                 |
| POLG     | c.3139C>T        | p.Arg1047Trp  | NM_002693.2    | rs181860632                 |
| POLG     | c.3151G>A        | p.Gly1051Arg  | NM_002693.2    | Chr15(GRCh38);g.89319053G>A |
| POLG     | c.3151G>C        | p.Gly1051Arg  | NM_002693.2    | rs121918049                 |
| POLG     | c.3287G>A        | p.Arg1096His  | NM_002693.2    | rs368435864                 |
| POLG     | c.3383G>A        | p.Arg1128His  | NM_002693.2    | Chr15(GRCh28);g.89318640G>A |
| POLG     | c.3412C>T        | p.Arg1138Cys  | NM_002693.2    | rs767138032                 |
| POLG     | c.3527C>T        | p.Ser1176Leu  | NM_002693.2    | rs776031396                 |
| POLG     | c.3573G>T        | p.Lys1191Asn  | NM_002693.2    | rs1085307741                |
| POLG     | c.3640C>T        | p.Gln1214Ter  | NM_002693.2    | rs781256643                 |
| PRICKLE1 | c.824C>T         | p.Thr275Met   | NM_153026.2    | rs199546979                 |
| PRRT2    | c.922C>T         | p.Arg308Cys   | NM_145239.2    | rs932713001                 |
| SCN1A    | c.602+1G>A       |               | NM_001165963.2 | rs794726827                 |
| SCN1A    | c.602+2dupT      |               | NM_001165963.2 | rs796053054                 |
| SCN1A    | c.791T>C         | p.Ile264Thr   | NM_001165963.2 | rs745664511                 |
| SCN1A    | c.986G>T         | p.Gly329Val   | NM_001165963.2 | rs779184118                 |
| SCN1A    | c.1216G>T        | p.Val406Phe   | NM_001165963.2 | rs121918768                 |
| SCN1A    | c.1264G>A        | p.Val422Met   | NM_001165963.2 | rs886042528                 |
| SCN1A    | c.2594G>A        | p.Arg865Gln   | NM_001165963.2 | rs1057517862                |
| SCN1A    | c.2665G>A        | p.Ala889Thr   | NM_001165963.2 | rs1266877537                |
| SCN1A    | c.2729A>G        | p.Gln910Arg   | NM_001165963.2 | rs1064795735                |
| SCN1A    | c.2839G>A        | p.Val947Met   | NM_001165963.2 | rs796052986                 |

|         |                          |                               |                |              |
|---------|--------------------------|-------------------------------|----------------|--------------|
| SCN1A   | c.2941C>A                | p.Leu981Ile                   | NM_001165963.2 | rs1057518112 |
| SCN1A   | c.3698G>A                | p.Gly1233Asp                  | NM_001165963.2 | rs1553532470 |
| SCN1A   | c.3776T>C                | p.Phe1259Ser                  | NM_001165963.2 | rs398123591  |
| SCN1A   | c.3879+5G>A              |                               | NM_001165963.2 | rs796052999  |
| SCN1A   | c.4171A>C                | p.Asn1391His                  | NM_001165963.2 | rs1295072436 |
| SCN1A   | c.4321G>A                | p.Ala1441Thr                  | NM_001165963.2 | rs121917974  |
| SCN1A   | c.4547C>T                | p.Ser1516Leu                  | NM_001165963.2 | rs139300715  |
| SCN1A   | c.4556C>T                | p.Pro1519Leu                  | NM_001165963.2 | rs372425457  |
| SCN1A   | c.472G>C                 | p.Glu158Gln                   | NM_001165963.2 | rs796053090  |
| SCN1A   | c.4787G>A                | p.Arg1596His                  | NM_001165963.2 | rs575368466  |
| SCN1A   | c.4793A>T                | p.Tyr1598Phe                  | NM_001165963.2 | rs377325221  |
| SCN1A   | c.4973C>T                | p.Thr1658Met                  | NM_001165963.2 | rs121917922  |
| SCN1A   | c.5306A>G                | p.Tyr1769Cys                  | NM_001165963.2 | rs886039460  |
| SCN1A   | c.5563C>T                | p.Pro1855Ser                  | NM_001165963.2 | rs794727415  |
| SCN1A   | c.5797delC               | p.Arg1933Glufs                | NM_001165963.2 | rs587780446  |
| SCN1B   | c.457G>A                 | p.Asp153Asn                   | NM_001037.4    | rs72550247   |
| SCN2A   | c.605C>T                 | p.Ala202Val                   | NM_020822.2    | rs1553567409 |
| SCN2A   | c.1267G>C                | p.Val423Leu                   | NM_020822.2    | rs796053180  |
| SCN2A   | c.2657T>C                | p.Leu886Ser                   | NM_020822.2    | rs796053118  |
| SCN2A   | c.4782G>C                | p.Trp1594Cys                  | NM_020822.2    | rs1057521747 |
| SCN2A   | c.4877G>A                | p.Arg1626Gln                  | NM_020822.2    | rs796053155  |
| SCN2A   | c.4879G>A                | p.Val1627Met                  | NM_020822.2    | rs796053156  |
| SCN2A   | c.4886G>A                | p.Arg1629His                  | NM_020822.2    | rs796053157  |
| SCN2A   | c.5645G>A                | p.Arg1882Gln                  | NM_020822.2    | rs794727444  |
| SCN8A   | c.632T>C                 | p.Val211Ala                   | NM_014191.3    | rs1057518487 |
| SCN8A   | c.1250A>C                | p.Gln417Pro                   | NM_014191.3    | rs878854973  |
| SCN8A   | c.1445A>G                | p.Lys482Arg                   | NM_014191.3    | rs769520392  |
| SCN8A   | c.2549G>A                | p.Arg850Gln                   | NM_014191.3    | rs587780586  |
| SCN8A   | c.3955G>T                | p.Ala1319Ser                  | NM_014191.3    | rs796053214  |
| SCN8A   | c.4235T>C                | p.Phe1412Ser                  | NM_014191.3    | rs1555228665 |
| SCN8A   | c.4441A>G                | p.Met1481Val                  | NM_014191.3    | rs886041670  |
| SCN8A   | c.4840A>G                | p.Thr1614Ala                  | NM_014191.3    | rs1555230909 |
| SCN8A   | c.4850G>A                | p.Arg1617Gln                  | NM_014191.3    | rs587777721  |
| SCN8A   | c.4877G>A                | p.Arg1626His                  | NM_014191.3    | rs886044328  |
| SCN8A   | c.5630A>G                | p.Asn1877Ser                  | NM_014191.3    | rs587780455  |
| SLC2A1  | c.400G>A                 | p.Gly134Ser                   | NM_006516.3    | rs1057518953 |
| SLC9A6  | c.430-9_430-5delTTTTA    |                               | NM_006359.2    | rs796053290  |
| SPTAN1  | c.6908_6916dupACCAGCTGG  | p.Leu2305_Gly2306insAspGlnLeu | NM_001130438.2 | rs587784440  |
| SRPX2   | c.1030C>A                | p.Leu3444Ile                  | NM_014467.2    | rs149051060  |
| STXBP1  | c.734A>G                 | p.His245Arg                   | NM_001032221.3 | rs587784453  |
| STXBP1  | c.874C>T                 | p.Arg292Cys                   | NM_003165.3    | rs786205598  |
| SYN1    | c.1297C>T                | p.His433Tyr                   | NM_133499.2    | rs41298474   |
| TBC1D24 | c.241_252delATCGTGGGCAAG | p.Ile81_Lys84del              | NM_001199107.1 | rs761918906  |
| TBC1D24 | c.328G>A                 | p.Gly110Ser                   | NM_001199107.1 | rs747821285  |
| TBC1D24 | c.457G>A                 | p.Glu153Lys                   | NM_001199107.1 | rs376712059  |
| TBC1D24 | c.679C>T                 | p.Arg227Trp                   | NM_001199107.1 | rs748302886  |
| TBC1D24 | c.680G>T                 | p.Arg227Leu                   | NM_001199107.1 | rs756181906  |
| TBC1D24 | c.845C>G                 | p.Pro282Arg                   | NM_020705.2    | rs747538224  |
| TCF4    | c.1741G>T                | p.Val581Phe                   | NM_001083962.1 | rs587784460  |
| TPP1    | c.1016G>A                | p.Arg339Gln                   | NM_000391.3    | rs765380155  |
| TPP1    | c.1058C>A                | p.Thr353Asn                   | NM_000391.3    | rs145966505  |
| TPP1    | c.381-10dupT             |                               | NM_000391.3    | rs146315473  |
| TPP1    | c.887-18A>G              |                               | NM_000391.3    | rs935526225  |
| TSC1    | c.737+3A>G               |                               | NM_000368.4    | rs118203439  |
| TSC1    | c.737G>A                 | p.Arg246Lys                   | NM_000368.4    | rs118203436  |
| TSC2    | c.886G>A                 | p.Val296Met                   | NM_000548.4    | rs747237113  |
| TSC2    | c.1864C>T                | p.Arg622Trp                   | NM_000548.4    | rs397514914  |
| TSC2    | c.2666C>T                | p.Ala889Val                   | NM_000548.4    | rs137854155  |
| TSC2    | c.3599G>A                | p.Arg1200Gln                  | NM_000548.3    | rs397515225  |
| TSC2    | c.4747G>A                | p.Glu1583Lys                  | NM_000548.4    | rs886039446  |
| TSC2    | c.5260-1G>C              |                               | NM_000548.3    | rs1057518103 |
| UBE3A   | c.349T>C                 | p.Cys117Arg                   | NM_130838.1    | rs587782907  |
| UBE3A   | c.947T>C                 | p.Met316Thr                   | NM_130838.1    | rs863225071  |
| UBE3A   | c.1805A>G                | p.Asn602Ser                   | NM_130838.1    | rs587784521  |
| UBE3A   | c.2503_2508delCTTAAA     | p.Leu835_Lys836del            | NM_130838.1    | rs863225070  |
| UBE3A   | c.2503C>T                | p.Leu835Phe                   | NM_130838.1    | rs587783097  |

**eTable 3. SCN1A Variant Discordance, Not Clinically Substantial**

| Nucleotide change     | Amino acid change | Transcript     | Lab A | Lab B | Lab C | Lab D | Others  |
|-----------------------|-------------------|----------------|-------|-------|-------|-------|---------|
| c.2T>C                | p.Met1Thr         | NM_001165963.2 | P     | LP    |       |       |         |
| c.68C>T               | p.Ala23Val        | NM_006920.6    | B     | LB    |       |       |         |
| c.90A>G               | p.Ala30=          | NM_001165963.1 | LB    |       |       | VUS   |         |
| c.144C>T              | p.Gly48=          | NM_001165963.1 | LB    |       |       | VUS   |         |
| c.251A>G              | p.Tyr84Cys        | NM_006920.4    | P     | LP    |       |       |         |
| c.265-4A>G            |                   | NM_001165963.1 | B     | LB    |       |       |         |
| c.333A>G              | p.Leu111=         | NM_001165963.1 | B     |       |       |       | VUS     |
| c.345T>C              | p.Asn115=         | NM_001165963.1 |       | B     | B     | B     | LB      |
| c.579C>T              | p.Leu193=         | NM_001165963.1 | B     |       |       | VUS   |         |
| c.694+10A>G           |                   | NM_001165963.1 | B     | LB    |       | VUS   |         |
| c.852T>C              | p.Asn284=         | NM_001165963.1 | LB    |       |       | VUS   |         |
| c.965-1G>A            |                   | NM_001165963.1 | P     | LP    |       |       |         |
| c.1000C>G             | p.Leu334Val       | NM_001165963.1 | LB    | VUS   | LB    |       | VUS     |
| c.1065T>C             | p.Gly355=         | NM_001165963.1 | B     |       |       |       | LB      |
| c.1131A>C             | p.Arg377=         | NM_001165963.1 | B     | B     | LB    | B     | LB, VUS |
| c.1150T>A             | p.Trp384Arg       | NM_001165963.1 | LP    | P     |       |       |         |
| c.1171-10_1171-9delTT |                   | NM_001165963.1 | B     | B     |       | B     | LB      |
| c.1212A>G             | p.Val404=         | NM_001165963.1 |       |       | B     | B     | B       |
| c.1329A>G             | p.Glu443=         | NM_001165963.2 |       | LB    |       |       |         |
| c.1378-3T>C           |                   | NM_001165963.1 | B     | LB    | LB    |       |         |
| c.1410C>T             | p.Ser470=         | NM_001165963.1 | B     |       | LB    |       | VUS     |
| c.1499G>A             | p.Arg500Gln       | NM_001165963.1 | VUS   | LB    |       | VUS   |         |
| c.1625G>A             | p.Arg542Gln       | NM_006920.4    | B     | B     | LB    | LB    | VUS     |
| c.1662+9C>A           |                   | NM_001165963.1 | B     | B     |       | B     | LB      |
| c.1680T>C             | p.Arg560=         | NM_001165963.2 |       | LB    | LB    | VUS   |         |
| c.1739G>A             | p.Arg580Gln       | NM_001165963.1 | VUS   | VUS   |       | VUS   | LB      |
| c.1797G>A             | p.Glu599=         | NM_001165963.2 |       | LB    | LB    | VUS   |         |
| c.1803C>T             | p.Asn601=         | NM_001165963.2 |       | LB    |       |       | VUS     |
| c.1811G>A             | p.Arg604His       | NM_006920.4    | B     | B     | B     | B     | LB      |
| c.1818T>C             | p.Asp606=         | NM_001165963.1 |       | LB    |       | VUS   |         |
| c.2044-5delT          |                   | NM_001165963.1 | LB    | B     |       |       | LB      |
| c.2044-5dupT          |                   | NM_001165963.1 | B     | B     |       | VUS   |         |
| c.2176+11A>C          |                   | NM_001165963.1 | LB    |       |       |       | VUS     |
| c.2292T>C             | p.Val764=         | NM_001165963.1 |       |       | B     | B     | LB, B   |
| c.2378C>T             | p.Thr793Met       | NM_001165963.1 | VUS   | LB    |       |       |         |
| c.2421C>T             | p.Phe807=         | NM_001165963.1 | B     | B     | LB    | LB    | LB      |
| c.2590C>T             | p.Leu864=         | NM_001165963.2 | LB    | VUS   |       |       |         |
| c.2591C>T             | p.Thr864Met       | NM_006920.4    |       | P     | LP    |       |         |
| c.2758C>T             | p.Arg920Cys       | NM_006920.4    | P     | P     |       | LP    |         |
| c.2889T>C             | p.Ala963=         | NM_001165963.1 |       | B     | LB    | B     | LB      |
| c.3039A>G             | p.Gln1013=        | NM_001165963.2 |       | VUS   | LB    |       | VUS     |
| c.3060C>A             | p.His1020Gln      | NM_001165963.1 | VUS   | LB    |       | VUS   |         |
| c.3199G>A             | p.Ala1067Thr      | NM_001165963.1 | B     |       | B     | B     | B, LB   |
| c.3481G>A             | p.Ala1161Thr      | NM_001165963.1 | VUS   | LB    |       | VUS   |         |
| c.3488C>G             | P.Thr1163Ser      | NM_001165963.1 | LB    | B     | LB    | VUS   | LB      |
| c.3573T>C             | p.Cys1191=        | NM_001165963.1 | LB    | LB    |       |       | VUS     |
| c.3585T>C             | p.As1195=         | NM_001165963.1 | LB    |       |       | VUS   |         |
| c.3591A>G             | p.Glu1197=        | NM_001165963.2 | LB    |       |       | VUS   |         |
| c.3681A>C             | p.Glu1227Asp      | NM_006920.4    | VUS   | LB    |       | VUS   |         |

|               |              |                |     |     |     |     |         |
|---------------|--------------|----------------|-----|-----|-----|-----|---------|
| c.3690T>C     | p.Tyr1230=   | NM_006920.4    | B   | LB  | B   | B   | LB      |
| c.3701G>A     | p.Arg1234Gln | NM_006920.4    | P   | LP  |     |     |         |
| c.3705+10delA |              | NM_001165963.1 | B   |     |     |     | VUS     |
| c.3749C>T     | p.Thr1250Met | NM_001165963.1 | VUS | LB  |     |     |         |
| c.3886T>C     | p.Leu1296=   | NM_001165963.1 | B   | B   | LB  |     |         |
| c.3891A>T     | p.Glu1297Asp | NM_006920.4    | LB  | LB  | LB  | VUS |         |
| c.3899C>T     | p.Thr1300Ile | NM_001165963.1 | VUS | VUS | LB  | VUS |         |
| c.3948G>A     | p.Arg1316=   | NM_001165963.1 | B   | B   | LB  | LB  |         |
| c.4129A>G     | p.II31377Val | NM_001165963.1 | VUS |     | LB  | VUS |         |
| c.4167C>T     | p.Asp1389=   | NM_001165963.1 | LB  | LB  |     |     | VUS     |
| c.4339-5G>A   |              | NM_001165963.1 |     | LB  |     | VUS |         |
| c.4393A>G     | p.Ile1465Val | NM_001165963.1 | B   | LB  | LB  | B   |         |
| c.4548G>A     | p.Ser1516=   | NM_001165963.1 | B   | B   | LB  | B   |         |
| c.4551A>G     | p.Ly1517=    | NM_001165963.1 | LB  | B   | LB  |     | LB      |
| c.4557G>A     | p.Pro1519=   | NM_001165963.1 | B   | LB  | LB  |     |         |
| c.4581+12C>T  |              | NM_001165963.1 | LB  |     |     |     | VUS     |
| c.4724G>A     | p.Arg1575His | NM_001165963.1 | VUS | LB  |     | VUS |         |
| c.4729T>C     | p.Cys1577Arg | NM_006920.4    | LP  | P   |     |     |         |
| c.4731T>C     | p.Asn1577=   | NM_001165963.1 | B   | B   | LB  | LB  | VUS     |
| c.4789G>T     | p.Asp1597Tyr | NM_006920.4    |     | LP  |     |     | P       |
| c.4855A>G     | p.Met1619Val | NM_001165963.1 | VUS | B   |     |     |         |
| c.4872G>A     | p.Leu1624=   | NM_001165963.1 | B   | B   | LB  | VUS |         |
| c.4887C>T     | p.Phe1629=   | NM_001165963.1 | LB  |     |     |     | VUS, LB |
| c.4905C>T     | p.Phe1635=   | NM_001165963.2 | LB  |     |     |     | B       |
| c.4945C>T     | p.Leu1649=   | NM_001165963.1 | B   | B   | LB  | B   | LB      |
| c.5217C>T     | p.Pro1739=   | NM_001165963.2 |     | LB  |     |     | VUS     |
| c.5286A>G     | p.Gly1762=   | NM_001165963.1 |     | B   | LB  | LB  |         |
| c.5346C>T     | p.Ile1782=   | NM_001165963.1 | B   |     |     |     | VUS     |
| c.5418G>A     | p.Glu1806=   | NM_001165963.1 | B   | B   | B   | B   | LB      |
| c.5532A>G     | p.Pro1844=   | NM_001165963.1 | LB  |     |     | VUS |         |
| c.5568G>A     | p.Met1856Ile | NM_001165963.1 | VUS | LB  | VUS | VUS |         |
| c.5693C>T     | p.Thr1898Ile | NM_006920.4    | LP  | P   |     |     |         |
| c.5749C>G     | p.Arg1917Gly | NM_006920.4    | LB  | B   | LB  | LB  | LB      |
| c.5809C>G     | p.Gln1937Glu | NM_001165963.2 | VUS | LB  |     |     |         |
| c.5864T>C     | p.Ile1955Thr | NM_001165963.1 | B   | LB  | B   | B   | LB      |

SCN1A Transcript NM\_001165963.2. <sup>a</sup> An empty cell is present for splice site variants as no amino acid is changed. Empty cells under the “Lab” categories are present when no interpretation was submitted from the corresponding laboratory. P, pathogenic; LP, likely pathogenic; VUS, variant of uncertain significance; LB, likely benign; B, benign.
